# Supplementary material for: The wondrous world of ABX3 molecular perovskites
Source: Royal Society of Chemistry journal article supplement (doi:10.1039/d4cc03833a), 2024-01-01
Supplement: d4cc03833a1.pdf [file d4cc03833a1.pdf]

## Supporting Information

### The Wondrous World of ABX<sub>3</sub> Molecular Perovskites

Silva M. Kronawitter<sup>a</sup> and Gregor Kieslich<sup>\*a</sup>

<sup>a</sup>Department of Chemistry, TUM School of Natural Sciences, Technical University of Munich, Lichtenbergstraße 4, 85748 Garching, Germany.

\* gregor.kieslich@tum.de

### Source Data for Literature Survey

**Table S1.** Columns in order: reference, year of publication, sum formula, A-site cation, space-group.

| X = (C <sub>2</sub> N <sub>3</sub> ) <sup>-</sup> |      |                                                                                                                                                                         |                                               |                                                                                            |
|---------------------------------------------------|------|-------------------------------------------------------------------------------------------------------------------------------------------------------------------------|-----------------------------------------------|--------------------------------------------------------------------------------------------|
| <sup>1</sup>                                      | 2020 | (ASU)Cd(C <sub>2</sub> N <sub>3</sub> ) <sub>3</sub>                                                                                                                    | azaspiroundecanium                            | <i>Pna</i> 2 <sub>1</sub> 100 K                                                            |
| <sup>2</sup>                                      | 2003 | (BeTriBu)B(C <sub>2</sub> N <sub>3</sub> ) <sub>3</sub><br>(B = Mn <sup>2+</sup> , Co <sup>2+</sup> )                                                                   | benzyltributylammonium                        | <i>Pnma</i> RT                                                                             |
| <sup>2</sup>                                      | 2003 | (BeTriEt)B(C <sub>2</sub> N <sub>3</sub> ) <sub>3</sub><br>(B = Mn <sup>2+</sup> , Fe <sup>2+</sup> )                                                                   | benzyltriethylammonium                        | <i>Pnma</i> RT                                                                             |
| <sup>3</sup>                                      | 2005 | (Cp* <sub>2</sub> Co)B(C <sub>2</sub> N <sub>3</sub> ) <sub>3</sub> (B = Mn <sup>2+</sup> , Co <sup>2+</sup> , Ni <sup>2+</sup> )                                       | decamethylcobaltocenium                       | <i>Im</i> -3 123 K                                                                         |
| <sup>3</sup>                                      | 2005 | (Cp* <sub>2</sub> Fe)B(C <sub>2</sub> N <sub>3</sub> ) <sub>3</sub> (B = Mn <sup>2+</sup> , Fe <sup>2+</sup> , Co <sup>2+</sup> , Ni <sup>2+</sup> , Cd <sup>2+</sup> ) | decamethylferrocenium                         | <i>Im</i> -3 123 K                                                                         |
| <sup>4</sup>                                      | 2024 | (DEP)Ni(C <sub>2</sub> N <sub>3</sub> ) <sub>3</sub>                                                                                                                    | diethylpiperidinium                           | <i>P2</i> <sub>1</sub> / <i>c</i> RT                                                       |
| <sup>4</sup>                                      | 2024 | (DIP)Ni(C <sub>2</sub> N <sub>3</sub> ) <sub>3</sub>                                                                                                                    | diisopropylpiperidinium                       | <i>P2</i> <sub>1</sub> / <i>c</i> RT                                                       |
| <sup>4</sup>                                      | 2024 | (DPP)Ni(C <sub>2</sub> N <sub>3</sub> ) <sub>3</sub>                                                                                                                    | dipropylpiperidinium                          | <i>C2</i> / <i>c</i> RT                                                                    |
| <sup>5</sup>                                      | 2017 | (Et <sub>3</sub> (CH <sub>2</sub> CHCH <sub>2</sub> )P)Mn(C <sub>2</sub> N <sub>3</sub> ) <sub>3</sub>                                                                  | allyltriethylphosphonium                      | <i>P2</i> <sub>1</sub> / <i>c</i> RT                                                       |
| <sup>6</sup>                                      | 2018 | (Et <sub>3</sub> P(CH <sub>2</sub> ) <sub>2</sub> Cl)Cd(C <sub>2</sub> N <sub>3</sub> ) <sub>3</sub>                                                                    | triethyl-(2-chloro-ethyl)-phosphonium         | <i>P2</i> <sub>1</sub> 2 <sub>1</sub> 2 <sub>1</sub> RT                                    |
| <sup>7</sup>                                      | 2019 | (Et <sub>3</sub> P(CH <sub>2</sub> ) <sub>2</sub> Cl)Mn(C <sub>2</sub> N <sub>3</sub> ) <sub>3</sub>                                                                    | triethyl-(2-chloro-ethyl)-phosphonium         | <i>P2</i> <sub>1</sub> / <i>c</i> RT                                                       |
| <sup>6</sup>                                      | 2018 | (Et <sub>3</sub> P(CH <sub>2</sub> ) <sub>2</sub> F)Cd(C <sub>2</sub> N <sub>3</sub> ) <sub>3</sub>                                                                     | triethyl-(2-fluoro-ethyl)-phosphonium         | <i>C2</i> / <i>c</i> RT                                                                    |
| <sup>7</sup>                                      | 2019 | (Et <sub>3</sub> P(CH <sub>2</sub> ) <sub>2</sub> F)Mn(C <sub>2</sub> N <sub>3</sub> ) <sub>3</sub>                                                                     | triethyl-(2-fluoro-ethyl)-phosphonium         | <i>C2</i> / <i>c</i> RT <i>Pnca</i> 347 K                                                  |
| <sup>5</sup>                                      | 2017 | (Et <sub>3</sub> (CH <sub>2</sub> OCH <sub>3</sub> )P)Mn(C <sub>2</sub> N <sub>3</sub> ) <sub>3</sub>                                                                   | triethylmethoxy-methylphosphonium             | <i>P2</i> <sub>1</sub> 2 <sub>1</sub> 2 <sub>1</sub> RT                                    |
| <sup>8</sup>                                      | 2017 | (Et <sub>3</sub> ( <i>n</i> -Pr)P)Cd(C <sub>2</sub> N <sub>3</sub> ) <sub>3</sub>                                                                                       | propyltriethylphosphonium                     | <i>P2</i> <sub>1</sub> 2 <sub>1</sub> 2 <sub>1</sub> RT                                    |
| <sup>5</sup>                                      | 2017 | (Et <sub>3</sub> ( <i>n</i> -Pr)P)Mn(C <sub>2</sub> N <sub>3</sub> ) <sub>3</sub>                                                                                       | propyltriethylphosphonium                     | <i>P2</i> <sub>1</sub> 2 <sub>1</sub> 2 <sub>1</sub> RT                                    |
| <sup>9</sup>                                      | 2021 | (Et <sub>4</sub> P)Mn(C <sub>2</sub> N <sub>3</sub> ) <sub>3</sub>                                                                                                      | tetraethylphosphonium                         | <i>P2</i> <sub>1</sub> 2 <sub>1</sub> 2 <sub>1</sub> RT                                    |
| <sup>10</sup>                                     | 2020 | (Pr <sub>3</sub> (CH <sub>2</sub> CHOHCH <sub>2</sub> )N)Mn(C <sub>2</sub> N <sub>3</sub> ) <sub>3</sub>                                                                | (2-hydroxy-propyl)-tripropyl-ammonium         | <i>P</i> -42 <sub>1</sub> / <i>c</i> 143 K                                                 |
| <sup>10</sup>                                     | 2020 | (Pr <sub>3</sub> (CH <sub>3</sub> CHCH <sub>2</sub> OH)N)Mn(C <sub>2</sub> N <sub>3</sub> ) <sub>3</sub>                                                                | (2-hydroxy-1-methyl-ethyl)-tripropyl-ammonium | <i>Pna</i> 2 <sub>1</sub> 193 K <i>P2</i> <sub>1</sub> 2 <sub>1</sub> 2 <sub>1</sub> 282 K |
| <sup>11</sup>                                     | 2004 | (SPH <sub>3</sub> )Mn(C <sub>2</sub> N <sub>3</sub> ) <sub>3</sub>                                                                                                      | triphenylsulfonium                            | <i>P2</i> <sub>1</sub> / <i>c</i> RT                                                       |
| <sup>12</sup>                                     | 2019 | (TriBuMeN)Co(C <sub>2</sub> N <sub>3</sub> ) <sub>3</sub>                                                                                                               | tributylmethylammonium                        | <i>P2</i> <sub>1</sub> / <i>n</i> RT                                                       |
| <sup>12</sup>                                     | 2019 | (TriBuMeN)Fe(C <sub>2</sub> N <sub>3</sub> ) <sub>3</sub>                                                                                                               | tributylmethylammonium                        | <i>P2</i> <sub>1</sub> / <i>n</i> RT                                                       |
| <sup>12</sup>                                     | 2019 | (TriBuMeN)Mn(C <sub>2</sub> N <sub>3</sub> ) <sub>3</sub>                                                                                                               | tributylmethylammonium                        | <i>P2</i> <sub>1</sub> / <i>n</i> RT                                                       |
| <sup>12</sup>                                     | 2019 | (TriBuMeN)Ni(C <sub>2</sub> N <sub>3</sub> ) <sub>3</sub>                                                                                                               | tributylmethylammonium                        | <i>P2</i> <sub>1</sub> / <i>n</i> RT                                                       |
| <sup>9</sup>                                      | 2021 | (TriBuMeP)Mn(C <sub>2</sub> N <sub>3</sub> ) <sub>3</sub>                                                                                                               | tributylmethylphosphonium                     | <i>P2</i> <sub>1</sub> / <i>n</i> RT                                                       |
| <sup>13</sup>                                     | 2021 | (TriPrMeN)Co(C <sub>2</sub> N <sub>3</sub> ) <sub>3</sub>                                                                                                               | tripropylmethylammonium                       | <i>Pnma</i> RT                                                                             |
| <sup>13</sup>                                     | 2021 | (TriPrMeN)Mn(C <sub>2</sub> N <sub>3</sub> ) <sub>3</sub>                                                                                                               | tripropylmethylammonium                       | <i>Pnma</i> RT                                                                             |
| <sup>13</sup>                                     | 2021 | (TriPrMeN)Ni(C <sub>2</sub> N <sub>3</sub> ) <sub>3</sub>                                                                                                               | tripropylmethylammonium                       | <i>Pnma</i> RT                                                                             |
| <sup>4</sup>                                      | 2024 | (PEP)Ni(C <sub>2</sub> N <sub>3</sub> ) <sub>3</sub>                                                                                                                    | ethylpropylpiperidinium                       | <i>P2</i> <sub>1</sub> / <i>c</i> RT                                                       |
| <sup>14</sup>                                     | 2023 | (Pr <sub>3</sub> NBu)Mn(C <sub>2</sub> N <sub>3</sub> ) <sub>3</sub>                                                                                                    | tripropylbutylammonium                        | <i>Pbcn</i> RT                                                                             |
| <sup>15</sup>                                     | 2018 | (Pr <sub>4</sub> N)Cd(C <sub>2</sub> N <sub>3</sub> ) <sub>3</sub>                                                                                                      | tetrapropylammonium                           | <i>P</i> -42 <sub>1</sub> / <i>c</i> RT                                                    |
| <sup>16, 17</sup>                                 | 2016 | (Pr <sub>4</sub> N)Co(C <sub>2</sub> N <sub>3</sub> ) <sub>3</sub>                                                                                                      | tetrapropylammonium                           | <i>P</i> -42 <sub>1</sub> / <i>c</i> 200 K                                                 |
| <sup>16, 17</sup>                                 | 2016 | (Pr <sub>4</sub> N)Fe(C <sub>2</sub> N <sub>3</sub> ) <sub>3</sub>                                                                                                      | tetrapropylammonium                           | <i>P</i> -42 <sub>1</sub> / <i>c</i> 200 K                                                 |
| <sup>18, 17, 19</sup>                             | 2005 | (Pr <sub>4</sub> N)Mn(C <sub>2</sub> N <sub>3</sub> ) <sub>3</sub>                                                                                                      | tetrapropylammonium                           | <i>P</i> -42 <sub>1</sub> / <i>c</i> RT                                                    |
| <sup>18, 16</sup>                                 | 2005 | (Pr <sub>4</sub> N)Ni(C <sub>2</sub> N <sub>3</sub> ) <sub>3</sub>                                                                                                      | tetrapropylammonium                           | <i>P</i> -42 <sub>1</sub> / <i>c</i> 160 K                                                 |
| X = (N <sub>3</sub> ) <sup>-</sup>                |      |                                                                                                                                                                         |                                               |                                                                                            |
| <sup>20</sup>                                     | 2017 | (CPrN)Mn(N <sub>3</sub> ) <sub>3</sub>                                                                                                                                  | cyclopropylammonium                           | <i>Pbca</i> 296 K                                                                          |
| <sup>21</sup>                                     | 1986 | (Et <sub>4</sub> N)Ca(N <sub>3</sub> ) <sub>3</sub>                                                                                                                     | tetraethylammonium                            | <i>P2</i> / <i>m</i> 293 K                                                                 |
| <sup>22</sup>                                     | 2013 | (MeN)Mn(N <sub>3</sub> ) <sub>3</sub>                                                                                                                                   | methylammonium                                | <i>P2</i> <sub>1</sub> / <i>c</i> 173 - 320 K                                              |
| <sup>23</sup>                                     | 2019 | (Me <sub>2</sub> EtN)Mn(N <sub>3</sub> ) <sub>3</sub>                                                                                                                   | dimethylethylammonium                         | <i>Cc</i> 296 K                                                                            |
| <sup>24</sup>                                     | 2014 | (Me <sub>2</sub> N)Cd(N <sub>3</sub> ) <sub>3</sub>                                                                                                                     | dimethylammonium                              | <i>P</i> -1 296 K <i>R</i> -3 203 - 273 K                                                  |
| <sup>22</sup>                                     | 2013 | (Me <sub>2</sub> N)Mn(N <sub>3</sub> ) <sub>3</sub>                                                                                                                     | dimethylammonium                              | <i>P2</i> <sub>1</sub> 173 K <i>Cmca</i> 323 K                                             |
| <sup>25</sup>                                     | 2015 | (Me <sub>3</sub> N)Cd(N <sub>3</sub> ) <sub>3</sub>                                                                                                                     | trimethylammonium                             | <i>P2</i> <sub>1</sub> / <i>c</i> 283 K <i>C2</i> / <i>c</i> 348 K                         |

|       |      |                                                     |                     |                                                                  |
|-------|------|-----------------------------------------------------|---------------------|------------------------------------------------------------------|
| 22    | 2013 | (Me <sub>3</sub> N)Mn(N <sub>3</sub> ) <sub>3</sub> | trimethylammonium   | P2 <sub>1</sub> /c 173 - 298 K C2/c 330 - 350 K R-3m 360 - 393 K |
| 26    | 1988 | (Me <sub>4</sub> N)Ca(N <sub>3</sub> ) <sub>3</sub> | tetramethylammonium | P4/nmm RT                                                        |
| 27,28 | 2000 | (Me <sub>4</sub> N)Cd(N <sub>3</sub> ) <sub>3</sub> | tetramethylammonium | C2/c 220 K P2 <sub>1</sub> /m 300 K Pm-3/m 350 K                 |
| 22    | 2013 | (Me <sub>4</sub> N)Mn(N <sub>3</sub> ) <sub>3</sub> | tetramethylammonium | P2 <sub>1</sub> /m 173 K Pm-3m 333 K                             |

**X = (BM<sub>4</sub>)<sup>-</sup> with M = F and H**

|    |      |                                                         |                        |                                                                             |
|----|------|---------------------------------------------------------|------------------------|-----------------------------------------------------------------------------|
| 29 | 2019 | (H <sub>2</sub> dabco)Na(BF <sub>4</sub> ) <sub>3</sub> | dabconium              | Pa-3 293 K Pm-3m 408 K                                                      |
| 30 | 2017 | (H <sub>2</sub> dabco)K(BF <sub>4</sub> ) <sub>3</sub>  | dabconium              | Pa-3 293 K                                                                  |
| 30 | 2017 | (H <sub>2</sub> pz)Na(BF <sub>4</sub> ) <sub>3</sub>    | piperazinium           | P4 <sub>3</sub> 293 K                                                       |
| 30 | 2021 | (MedabcoF)Rb(BF <sub>4</sub> ) <sub>3</sub>             | fluoromethyl-dabconium | P2 <sub>1</sub> /c 168 K P4 <sub>2</sub> /mbc 253 K Fm-3c 315 K Pm-3m 353 K |
| 31 | 2015 | (NH <sub>4</sub> )Ca(BH <sub>4</sub> ) <sub>3</sub>     | ammonium               | Pm-3m RT                                                                    |

**X = (CN)<sup>-</sup>**

|    |      |                                                          |                               |                                |
|----|------|----------------------------------------------------------|-------------------------------|--------------------------------|
| 32 | 2016 | (Ac) <sub>2</sub> KFe(CN) <sub>6</sub>                   | acetamidinium                 | C2/m 150 K R-3m RT Fm-3m 395 K |
| 33 | 2016 | (Az) <sub>2</sub> KCo(CN) <sub>6</sub>                   | azetidinium                   | Fm-3m 113 K                    |
| 34 | 2022 | (Az) <sub>2</sub> KCr(CN) <sub>6</sub>                   | azetidinium                   | Fm-3m 210 K                    |
| 34 | 2022 | (Az) <sub>2</sub> KFe(CN) <sub>6</sub>                   | azetidinium                   | Fm-3m 240 K                    |
| 32 | 2016 | (Gua) <sub>2</sub> KFe(CN) <sub>6</sub>                  | guanidinium                   | R-3c RT R-3m 425 K Fm-3m 455 K |
| 35 | 2015 | (Im) <sub>2</sub> KCo(CN) <sub>6</sub>                   | imidazolium                   | R-3m 293 K                     |
| 36 | 2010 | (Im) <sub>2</sub> KFe(CN) <sub>6</sub>                   | imidazolium                   | C2/c 83 K R-3m 173, 293 K      |
| 37 | 2013 | (Me <sub>2</sub> N) <sub>2</sub> KCo(CN) <sub>6</sub>    | dimethylammonium              | P4/mnc 113, 280, 293 K         |
| 38 | 2015 | (Me <sub>2</sub> N) <sub>2</sub> KFe(CN) <sub>6</sub>    | dimethylammonium              | P4/mnc 165 K, RT               |
| 39 | 2019 | (Me <sub>2</sub> N) <sub>2</sub> KCr(CN) <sub>6</sub>    | dimethylammonium              | P4/mnc 140, 230 K              |
| 40 | 2016 | (MeN) <sub>2</sub> KCo(CN) <sub>6</sub>                  | methylammonium                | C2/c 293 K Fm-3m 463 K         |
| 38 | 2016 | (MeN) <sub>2</sub> KFe(CN) <sub>6</sub>                  | methylammonium                | C2/c 193 K Fm-3m 443 K         |
| 40 | 2016 | (MeN) <sub>2</sub> NaCo(CN) <sub>6</sub>                 | methylammonium                | Fm-3m 293 K                    |
| 41 | 1994 | (MeN) <sub>2</sub> NaFe(CN) <sub>6</sub>                 | methylammonium                | Fm-3m 295 K                    |
| 40 | 2016 | (MeN) <sub>2</sub> RbCo(CN) <sub>6</sub>                 | methylammonium                | C2/c 293 K                     |
| 42 | 2018 | (Me <sub>3</sub> N) <sub>2</sub> KFe(CN) <sub>6</sub>    | trimethylammonium             | C2/c 113 K Fm-3m 350 K         |
| 43 | 2022 | (Me <sub>3</sub> FMeN) <sub>2</sub> KFe(CN) <sub>6</sub> | Trimethylfluoromethylammonium | C2/c 243 K                     |
| 44 | 2020 | (Me <sub>3</sub> NOH) <sub>2</sub> KCo(CN) <sub>6</sub>  | Trimethylhydroxylammonium     | Cc 100 K Fm-3m 440 K           |
| 45 | 2017 | (Me <sub>3</sub> NOH) <sub>2</sub> KFe(CN) <sub>6</sub>  | Trimethylhydroxylammonium     | Cc RT Fm-3m 408 K              |
| 41 | 1994 | (Me <sub>4</sub> N) <sub>2</sub> CsCo(CN) <sub>6</sub>   | tetramethylammonium           | I2/m 295 K                     |
| 46 | 2000 | (Me <sub>4</sub> N) <sub>2</sub> CsCr(CN) <sub>6</sub>   | tetramethylammonium           | C2/c RT                        |
| 46 | 2000 | (Me <sub>4</sub> N) <sub>2</sub> KCr(CN) <sub>6</sub>    | tetramethylammonium           | Fm-3m RT                       |
| 38 | 2016 | (Me <sub>4</sub> N) <sub>2</sub> KFe(CN) <sub>6</sub>    | tetramethylammonium           | I4/m RT Fm-3m 373 K            |
| 47 | 1997 | (Me <sub>4</sub> N) <sub>2</sub> RbCr(CN) <sub>6</sub>   | tetramethylammonium           | R-3m RT                        |
| 47 | 1997 | (Me <sub>4</sub> N) <sub>2</sub> RbFe(CN) <sub>6</sub>   | tetramethylammonium           | R-3m RT                        |
| 47 | 1997 | (Me <sub>4</sub> N) <sub>2</sub> TlCr(CN) <sub>6</sub>   | tetramethylammonium           | R-3m RT                        |
| 47 | 1997 | (Me <sub>4</sub> N) <sub>2</sub> TlFe(CN) <sub>6</sub>   | tetramethylammonium           | C2/c RT                        |
| 48 | 2021 | (Pyr) <sub>2</sub> KCr(CN) <sub>6</sub>                  | pyrrolidinium                 | Fm-3m 295 K                    |

**X = [Au(CN)<sub>2</sub>]<sup>-</sup> and [Ag(CN)<sub>2</sub>]<sup>-</sup>**

|    |      |                                            |                              |            |
|----|------|--------------------------------------------|------------------------------|------------|
| 49 | 2016 | (PPN)Cd(Au(CN) <sub>2</sub> ) <sub>3</sub> | bistriphenylphosphineiminium | I2/a 291 K |
| 50 | 2007 | (PPN)Co(Au(CN) <sub>2</sub> ) <sub>3</sub> | bistriphenylphosphineiminium | R-3c RT    |
| 49 | 2016 | (PPN)Mn(Au(CN) <sub>2</sub> ) <sub>3</sub> | bistriphenylphosphineiminium | I2/a 150 K |
| 50 | 2007 | (PPN)Ni(Au(CN) <sub>2</sub> ) <sub>3</sub> | bistriphenylphosphineiminium | R-3c RT    |

**X = (HCOO)<sup>-</sup>**

|    |      |                                                                                    |                            |                                                                                 |
|----|------|------------------------------------------------------------------------------------|----------------------------|---------------------------------------------------------------------------------|
| 51 | 2017 | (Ac)Mn(HCOO) <sub>3</sub>                                                          | acetamidinium              | P2 <sub>1</sub> /n 100 K Imma 320 K                                             |
| 52 | 2011 | (Az)Cu(HCOO) <sub>3</sub>                                                          | azetidinium                | P2 <sub>1</sub> /c 123, 280, 243, 260 K Pnma 300, 333 K                         |
| 53 | 2004 | (Az)Mn(HCOO) <sub>3</sub>                                                          | azetidinium                | P2 <sub>1</sub> /c 180 K, Pnma 290 K                                            |
| 54 | 2012 | (Az)Zn(HCOO) <sub>3</sub>                                                          | azetidinium                | Pnma RT                                                                         |
| 55 | 2011 | (DMe <sub>2</sub> N)Co(DCOO) <sub>3</sub>                                          | perdeuterodimethylammonium | Cc 93 K, R-3c 293, 373 K                                                        |
| 56 | 2015 | (EtN)Cu(HCOO) <sub>3</sub>                                                         | ethylammonium              | Pna2 <sub>1</sub> 93, 180, 291, 320, 340 K P2 <sub>1</sub> 2 <sub>1</sub> 360 K |
| 57 | 2014 | (EtN)Mg(HCOO) <sub>3</sub>                                                         | ethylammonium              | Pna2 <sub>1</sub> 93, 280, 292, 363 K R-3 378 K Imma 430 K                      |
| 53 | 2004 | (EtN)Mn(HCOO) <sub>3</sub>                                                         | ethylammonium              | Pna2 <sub>1</sub> 180, 290 K                                                    |
| 58 | 2016 | (EtN)Na <sub>0.5</sub> Al <sub>0.5</sub> (HCOO) <sub>3</sub>                       | ethylammonium              | Pn 270 K P2 <sub>1</sub> /n 375 K                                               |
| 58 | 2016 | (EtN)Na <sub>0.5</sub> Al <sub>0.475</sub> Cr <sub>0.025</sub> (HCOO) <sub>3</sub> | ethylammonium              | Pn RT                                                                           |
| 58 | 2016 | (EtN)Na <sub>0.5</sub> Cr <sub>0.5</sub> (HCOO) <sub>3</sub>                       | ethylammonium              | Pn 297 K P2 <sub>1</sub> /n 400 K                                               |
| 59 | 2015 | (EtN)Na <sub>0.5</sub> Fe <sub>0.5</sub> (HCOO) <sub>3</sub>                       | ethylammonium              | Pn 297 K P2 <sub>1</sub> /n 377 K                                               |
| 60 | 2015 | (Fmd)Co(HCOO) <sub>3</sub>                                                         | formamidinium              | Pnna 295 K                                                                      |
| 61 | 2017 | (Fmd)Cu(HCOO) <sub>3</sub>                                                         | formamidinium              | Pnna 173 K                                                                      |
| 60 | 2015 | (Fmd)Fe(HCOO) <sub>3</sub>                                                         | formamidinium              | Pnna 294 K                                                                      |
| 62 | 2012 | (Fmd)Mg(HCOO) <sub>3</sub>                                                         | formamidinium              | Pnna 120 K                                                                      |
| 63 | 2014 | (Fmd)Mn(HCOO) <sub>3</sub>                                                         | formamidinium              | C2/c 110, 295 K R-3c 355 K                                                      |
| 64 | 1986 | (Fmd)Zn(HCOO) <sub>3</sub>                                                         | formamidinium              | Pnna 295 K                                                                      |
| 65 | 2009 | (Gua)Co(HCOO) <sub>3</sub>                                                         | guanidinium                | Pnna 293 K                                                                      |
| 65 | 2009 | (Gua)Cu(HCOO) <sub>3</sub>                                                         | guanidinium                | Pna2 <sub>1</sub> 293 K                                                         |
| 66 | 2016 | (Gua)Cd(HCOO) <sub>3</sub>                                                         | guanidinium                | R-3c 150, 250, 300, 450 K                                                       |
| 65 | 2009 | (Gua)Fe(HCOO) <sub>3</sub>                                                         | guanidinium                | Pnna 293 K                                                                      |
| 62 | 2012 | (Gua)Mg(HCOO) <sub>3</sub>                                                         | guanidinium                | Pnna 298 K                                                                      |

|       |      |                                                                            |                     |                                                                                             |
|-------|------|----------------------------------------------------------------------------|---------------------|---------------------------------------------------------------------------------------------|
| 65    | 2009 | (Gua)Mn(HCOO) <sub>3</sub>                                                 | guanidinium         | <i>Pnna</i> 293 K                                                                           |
| 65    | 2009 | (Gua)Ni(HCOO) <sub>3</sub>                                                 | guanidinium         | <i>Pnna</i> 293 K                                                                           |
| 65    | 2009 | (Gua)Zn(HCOO) <sub>3</sub>                                                 | guanidinium         | <i>Pnna</i> 293 K                                                                           |
| 67    | 2016 | (Im)Mg(HCOO) <sub>3</sub>                                                  | imidazolium         | <i>P2<sub>1</sub>/n</i> 296 K                                                               |
| 68    | 2013 | (Im)Mn(HCOO) <sub>3</sub>                                                  | imidazolium         | <i>P2<sub>1</sub>/n</i> 293 K <i>P-42<sub>1m</sub></i> 453 K                                |
| 69    | 2017 | (Hym)Co(HCOO) <sub>3</sub>                                                 | hydrazinium         | <i>Pna2<sub>1</sub></i> 100, 298 K <i>Pnma</i> 353, 393 K                                   |
| 70    | 2016 | (Hym)Fe(HCOO) <sub>3</sub>                                                 | hydrazinium         | <i>Pna2<sub>1</sub></i> 290 K <i>Pnma</i> 360 K                                             |
| 71    | 2014 | (Hym)Mg(HCOO) <sub>3</sub>                                                 | hydrazinium         | <i>P2<sub>1</sub>2<sub>1</sub>2<sub>1</sub></i> 110, 200, 292 K <i>P6<sub>3</sub></i> 400 K |
| 71    | 2014 | (Hym)Mn(HCOO) <sub>3</sub>                                                 | hydrazinium         | <i>Pna2<sub>1</sub></i> 110, 200, 290 K <i>Pnma</i> 400 K                                   |
| 71    | 2014 | (Hym)Zn(HCOO) <sub>3</sub>                                                 | hydrazinium         | <i>Pna2<sub>1</sub></i> 110, 200, 290 K <i>Pnma</i> 375 K                                   |
| 72    | 2021 | (Me <sub>2</sub> Hym)Mn(HCOO) <sub>3</sub>                                 | dimethylhydrazinium | <i>P2<sub>1</sub>/n</i> 99.9, 299.9 K                                                       |
| 73    | 2017 | (MeHym)Fe(HCOO) <sub>3</sub>                                               | methylhydrazinium   | <i>R-3c</i> 200, 280, 330 K                                                                 |
| 73    | 2017 | (MeHym)Mg(HCOO) <sub>3</sub>                                               | methylhydrazinium   | <i>R-3c</i> 240, 280, 345 K                                                                 |
| 73    | 2017 | (MeHym)Mn(HCOO) <sub>3</sub>                                               | methylhydrazinium   | <i>P1</i> 100 K <i>R-3c</i> 230, 290, 330 K                                                 |
| 73    | 2017 | (MeHym)Zn(HCOO) <sub>3</sub>                                               | methylhydrazinium   | <i>R-3c</i> 180, 300, 350 K                                                                 |
| 74    | 2010 | (Me <sub>2</sub> N)Cd(HCOO) <sub>3</sub>                                   | dimethylammonium    | <i>R-3c</i> 293 K                                                                           |
| 75    | 2004 | (Me <sub>2</sub> N)Co(HCOO) <sub>3</sub>                                   | dimethylammonium    | <i>R-3c</i> 297 K                                                                           |
| 76    | 1973 | (Me <sub>2</sub> N)Cu(HCOO) <sub>3</sub>                                   | dimethylammonium    | <i>I2/c</i> 295 K                                                                           |
| 77    | 2009 | (Me <sub>2</sub> N)Fe(HCOO) <sub>3</sub>                                   | dimethylammonium    | <i>R-3c</i> 273 K                                                                           |
| 78    | 2008 | (Me <sub>2</sub> N)Mg(HCOO) <sub>3</sub>                                   | dimethylammonium    | <i>R-3c</i> 293 K                                                                           |
| 53    | 2004 | (Me <sub>2</sub> N)Mn(HCOO) <sub>3</sub>                                   | dimethylammonium    | <i>R-3c</i> 180, 290 K                                                                      |
| 79    | 2015 | (Me <sub>2</sub> N)Na <sub>0.5</sub> Cr <sub>0.5</sub> (HCOO) <sub>3</sub> | dimethylammonium    | <i>R-3</i> 115, 302 K                                                                       |
| 80    | 2014 | (Me <sub>2</sub> N)Na <sub>0.5</sub> Fe <sub>0.5</sub> (HCOO) <sub>3</sub> | dimethylammonium    | <i>R-3</i> 115, 293 K                                                                       |
| 75    | 2004 | (Me <sub>2</sub> N)Ni(HCOO) <sub>3</sub>                                   | dimethylammonium    | <i>P-1</i> 110 K <i>R-3c</i> 297 K                                                          |
| 81    | 2008 | (Me <sub>2</sub> N)Zn(HCOO) <sub>3</sub>                                   | dimethylammonium    | <i>R-3c</i> 273 K                                                                           |
| 72    | 2021 | (Me <sub>2</sub> Hym)Mn(HCOO) <sub>3</sub>                                 | dimethylhydrazinium | <i>P2<sub>1</sub>/n</i> 100, 300 K                                                          |
| 82    | 2016 | (MeN)Co(HCOO) <sub>3</sub>                                                 | methylammonium      | <i>Pnma</i> 100 K                                                                           |
| 66    | 2016 | (MeN)Cd(HCOO) <sub>3</sub>                                                 | methylammonium      | <i>Pnma</i> RT                                                                              |
| 66    | 2016 | (MeN)Fe(HCOO) <sub>3</sub>                                                 | methylammonium      | <i>Pnma</i> RT                                                                              |
| 66    | 2016 | (MeN)Mg(HCOO) <sub>3</sub>                                                 | methylammonium      | <i>Pnma</i> RT                                                                              |
| 53    | 2004 | (MeN)Mn(HCOO) <sub>3</sub>                                                 | methylammonium      | <i>Pnma</i> 180, 290 K                                                                      |
| 66    | 2016 | (MeN)Zn(HCOO) <sub>3</sub>                                                 | methylammonium      | <i>Pnma</i> RT                                                                              |
| 83    | 2014 | (Me <sub>4</sub> N)Mn(HCOO) <sub>3</sub>                                   | tetramethylammonium | <i>Pnma</i> RT                                                                              |
| 83    | 2014 | (NH <sub>4</sub> )Mn(HCOO) <sub>3</sub>                                    | ammonium            | <i>Im-3</i> RT                                                                              |
| 84,85 | 1983 | (NH <sub>4</sub> )Cd(HCOO) <sub>3</sub>                                    | ammonium            | <i>Pna2<sub>1</sub></i> 100, 295, 350 K                                                     |

#### X = (H<sub>2</sub>POO)<sup>-</sup>

|    |      |                                                        |                      |                                              |
|----|------|--------------------------------------------------------|----------------------|----------------------------------------------|
| 86 | 2017 | (Fmd)Mn(H <sub>2</sub> POO) <sub>3</sub>               | formamidinium        | <i>P2<sub>1</sub>/c</i> 115 K <i>C2/c</i> RT |
| 87 | 2022 | (Gua)Cd(H <sub>2</sub> POO) <sub>3</sub>               | guanidinium          | <i>R-3c</i> 293 K                            |
| 87 | 2022 | (Gua)Co(H <sub>2</sub> POO) <sub>3</sub>               | guanidinium          | <i>I2/m</i> 293 K                            |
| 86 | 2017 | (Gua)Mn(H <sub>2</sub> POO) <sub>3</sub>               | guanidinium          | <i>I2/m</i> 298 K <i>P-1</i> 302 K           |
| 88 | 2021 | (HyEt)Mn(H <sub>2</sub> POO) <sub>3</sub>              | hydroxyethylammonium | <i>P2<sub>1</sub>/n</i> RT                   |
| 87 | 2022 | (Im)Cd(H <sub>2</sub> POO) <sub>3</sub>                | imidazolium          | <i>P2<sub>1</sub>/c</i> RT                   |
| 87 | 2022 | (Im)Co(H <sub>2</sub> POO) <sub>3</sub>                | imidazolium          | <i>Pbca</i> 295 K                            |
| 86 | 2017 | (Im)Mn(H <sub>2</sub> POO) <sub>3</sub>                | imidazolium          | <i>P2<sub>1</sub>/c</i> RT                   |
| 89 | 2020 | (MeHym)Mn(HCOO) <sub>3</sub>                           | methylhydrazinium    | <i>Pnma</i> 100, 295 K                       |
| 90 | 2018 | (Me <sub>2</sub> N)Mn(H <sub>2</sub> POO) <sub>3</sub> | dimethylammonium     | <i>P2<sub>1</sub>/c</i> RT                   |
| 87 | 2022 | (Pyr)Cd(H <sub>2</sub> POO) <sub>3</sub>               | pyrrolidinium        | <i>Aea2</i> 295 K                            |
| 88 | 2021 | (Pyr)Mn(H <sub>2</sub> POO) <sub>3</sub>               | pyrrolidinium        | <i>P2<sub>1</sub>/n</i> RT                   |
| 86 | 2017 | (Trz)Mn(H <sub>2</sub> POO) <sub>3</sub>               | triazolium           | <i>P2<sub>1</sub>/c</i> RT                   |

#### X = (SCN)<sup>-</sup>

|    |      |                                                         |                    |                                  |
|----|------|---------------------------------------------------------|--------------------|----------------------------------|
| 91 | 2021 | (Me <sub>2</sub> N) <sub>2</sub> CdNi(SCN) <sub>6</sub> | dimethylammonium   | <i>P-1</i> 293 K                 |
| 91 | 2021 | (Me <sub>2</sub> N) <sub>2</sub> CdMn(SCN) <sub>6</sub> | dimethylammonium   | <i>P-1</i> 293 K                 |
| 91 | 2021 | (Me <sub>3</sub> S)Cd(SCN) <sub>3</sub>                 | trimethylsulfonium | <i>Pa-3</i> RT                   |
| 92 | 2016 | (NH <sub>4</sub> ) <sub>2</sub> CdNi(SCN) <sub>6</sub>  | ammonium           | <i>P2<sub>1</sub>/c</i> 90 K, RT |

#### X = (ClO<sub>4</sub>)<sup>-</sup>

|    |      |                                                          |                  |                                               |
|----|------|----------------------------------------------------------|------------------|-----------------------------------------------|
| 30 | 2017 | (H <sub>2</sub> dabco)K(ClO <sub>4</sub> ) <sub>3</sub>  | dabconium        | <i>Pa-3</i> 293 K                             |
| 30 | 2017 | (H <sub>2</sub> dabco)Na(ClO <sub>4</sub> ) <sub>3</sub> | dabconium        | <i>Pa-3</i> 293 K                             |
| 93 | 2018 | (H <sub>2</sub> dabco)Rb(ClO <sub>4</sub> ) <sub>3</sub> | dabconium        | <i>Pa-3</i> 293 K                             |
| 94 | 2018 | (H <sub>2</sub> dabco)K(ClO <sub>4</sub> ) <sub>3</sub>  | hydroxydabconium | <i>P2<sub>1</sub>/c</i> 223 K <i>Fm-3c</i> RT |
| 95 | 2017 | (H <sub>2</sub> hpz)K(ClO <sub>4</sub> ) <sub>3</sub>    | homopiperazinium | <i>Pbca</i> RT                                |
| 30 | 2017 | (H <sub>2</sub> pz)Na(ClO <sub>4</sub> ) <sub>3</sub>    | piperazinium     | <i>P2<sub>1</sub>/c</i> RT, 378 K             |

## References

- 1 S. Burger, S. Kronawitter, H. L. B. Boström, J. K. Zaręba and G. Kieslich, *Dalton Trans.*, 2020, **49**, 10740–10744.
- 2 M.-L. Tong, J. Ru, Y.-M. Wu, X.-M. Chen, H.-C. Chang, K. Mochizuki and S. Kitagawa, *New J. Chem.*, 2003, **27**, 779–782.

- 3 P. M. van der Werff, E. Martínez-Ferrero, S. R. Batten, P. Jensen, C. Ruiz-Pérez, M. Almeida, J. C. Waerenborgh, J. D. Cashion, B. Moubaraki, J. R. Galán-Mascarós, J. M. Martínez-Agudo, E. Coronado and K. S. Murray, *Dalton Trans.*, 2005, 285–290.
- 4 S. M. Kronawitter, S. Park, S. A. Hallweger, E. Myatt, J. Pitcairn, M. J. Cliffe, D. Daisenberger, M. Drees and G. Kieslich, *Mater. Adv.*, 2024.
- 5 F.-J. Geng, L. Zhou, P.-P. Shi, X.-L. Wang, X. Zheng, Y. Zhang, D.-W. Fu and Q. Ye, *J. Mater. Chem. C*, 2017, **5**, 1529–1536.
- 6 M.-M. Zhao, L. Zhou, P.-P. Shi, X. Zheng, X.-G. Chen, J.-X. Gao, F.-J. Geng, Q. Ye and D.-W. Fu, *Chem. Commun.*, 2018, **54**, 13275–13278.
- 7 M.-M. Zhao, L. Zhou, P.-P. Shi, X. Zheng, X.-G. Chen, J.-X. Gao, L. He, Q. Ye, C.-M. Liu and D.-W. Fu, *Chem. Eur. J.*, 2019, **25**, 6447–6454.
- 8 L. Zhou, X. Zheng, P.-P. Shi, Z. Zafar, H.-Y. Ye, D.-W. Fu and Q. Ye, *Inorg. Chem.*, 2017, **56**, 3238–3244.
- 9 Y.-Q. Wu, J.-Y. Zhang, X. He, Z.-X. Wang, H.-L. Cai and M.-X. Li, *Cryst. Growth Des.*, 2021, **21**, 6245–6253.
- 10 Z.-B. Liu, L. He, P.-P. Shi, Q. Ye and D.-W. Fu, *J. Phys. Chem. Lett.*, 2020, **11**, 7960–7965.
- 11 J. A. Schlueter, J. L. Manson, K. A. Hyzer and U. Geiser, *Inorg. Chem.*, 2004, **43**, 4100–4102.
- 12 M. Mączka, A. Gaḡor, M. Ptak, D. Stefańska, L. Macalik, A. Pikul and A. Sieradzki, *Dalton Trans.*, 2019, **48**, 13006–13016.
- 13 S. Burger, S. Grover, K. T. Butler, H. L. B. Boström, R. Grau-Crespo and G. Kieslich, *Mater. Horiz.*, 2021, **8**, 2444–2450.
- 14 S. M. Kronawitter, S. A. Hallweger, J. Meyer, C. Pedri, S. Burger, A. Alhadid, S. Henke and G. Kieslich, *APL Mater.*, 2023, **11**.
- 15 J. M. Bermúdez-García, S. Yáñez-Vilar, A. García-Fernández, M. Sánchez-Andújar, S. Castro-García, J. López-Beceiro, R. Artiaga, M. Dilshad, X. Moya and M. A. Señarís-Rodríguez, *J. Mater. Chem. C*, 2018, **6**, 9867–9874.
- 16 J. M. Bermúdez-García, M. Sánchez-Andújar, S. Yáñez-Vilar, S. Castro-García, R. Artiaga, J. López-Beceiro, L. Botana, A. Alegría and M. A. Señarís-Rodríguez, *J. Mater. Chem. C*, 2016, **4**, 4889–4898.
- 17 B. K. Shaw, A. R. Hughes, M. Ducamp, S. Moss, A. Debnath, A. F. Sapnik, M. F. Thorne, L. N. McHugh, A. Pugliese, D. S. Keeble, P. Chater, J. M. Bermudez-Garcia, X. Moya, S. K. Saha, D. A. Keen, F.-X. Coudert, F. Blanc and T. D. Bennett, *Nat. Chem.*, 2021, **13**, 778–785.
- 18 J. A. Schlueter, J. L. Manson and U. Geiser, *Inorg. Chem.*, 2005, **44**, 3194–3202.
- 19 J. M. Bermúdez-García, M. Sánchez-Andújar, S. Castro-García, J. López-Beceiro, R. Artiaga and M. A. Señarís-Rodríguez, *Nat. Commun.*, 2017, **8**, 15715.
- 20 K. Qian, Y. Xu, Z. Wang and J. Yang, *Z. Naturforsch. B*, 2017, **72**, 409–413.
- 21 F. A. Mautner and H. Krischner, *Z. Kristallogr. – Cryst. Mater.*, 1986, **175**, 105–110.
- 22 X.-H. Zhao, X.-C. Huang, S.-L. Zhang, D. Shao, H.-Y. Wei and X.-Y. Wang, *J. Am. Chem. Soc.*, 2013, **135**, 16006–16009.
- 23 J. Yang, Y. Huang, T. Fang, K. Qian, W.-B. Chen, X.-F. Yu, Y.-C. Ai, J.-L. Ye and X.-Y. Li, *Z. Naturforsch. B*, 2019, **74**, 335–339.

- 24 Z.-Y. Du, T.-T. Xu, B. Huang, Y.-J. Su, W. Xue, C.-T. He, W.-X. Zhang and X.-M. Chen, *Angew. Chem. Int. Ed. Engl.*, 2015, **127**, 928–932.
- 25 Z.-Y. Du, Y.-Z. Sun, S.-L. Chen, B. Huang, Y.-J. Su, T.-T. Xu, W.-X. Zhang and X.-M. Chen, *Chem. Commun.*, 2015, **51**, 15641–15644.
- 26 F. A. Mautner, H. Krischner and C. Kratky, *Monatsh. fur Chem.*, 1988, **119**, 1245–1249.
- 27 S. Hanna, F. A. Mautner, B. Koppelhuber-Bitschnau and M. Abu-Youssef, *MSF*, 2000, **321-324**, 1098–1101.
- 28 Z.-Y. Du, Y.-P. Zhao, W.-X. Zhang, H.-L. Zhou, C.-T. He, W. Xue, B.-Y. Wang and X.-M. Chen, *Chem. Commun.*, 2014, **50**, 1989–1991.
- 29 Le Ye, Z.-X. Gong, C. Shi, J.-J. Ma, H. Liang, F.-W. Qi, D.-Y. E, C.-F. Wang, Y. Zhang and H.-Y. Ye, *CrystEngComm*, 2019, **21**, 7043–7047.
- 30 Y.-L. Sun, X.-B. Han and W. Zhang, *Chem. Eur. J.*, 2017, **23**, 11126–11132.
- 31 P. Schouwink, F. Morelle, Y. Sadikin, Y. Filinchuk and R. Černý, *Energies*, 2015, **8**, 8286–8299.
- 32 W.-J. Xu, K.-P. Xie, Z.-F. Xiao, W.-X. Zhang and X.-M. Chen, *Cryst. Growth Des.*, 2016, **16**, 7212–7217.
- 33 K. Qian, F. Shao, Z. Yan, J. Pang, X. Chen and C. Yang, *CrystEngComm*, 2016, **18**, 7671–7674.
- 34 M. Rok, M. Moskwa, J. Hetmańczyk, Ł. Hetmańczyk and G. Bator, *CrystEngComm*, 2022, **24**, 4932–4939.
- 35 X. Zhang, X.-D. Shao, S.-C. Li, Y. Cai, Y.-F. Yao, R.-G. Xiong and W. Zhang, *Chem. Commun.*, 2015, **51**, 4568–4571.
- 36 W. Zhang, Y. Cai, R.-G. Xiong, H. Yoshikawa and K. Awaga, *Angew. Chem. Int. Ed. Engl.*, 2010, **49**, 6608–6610.
- 37 W. Zhang, H.-Y. Ye, R. Graf, H. W. Spiess, Y.-F. Yao, R.-Q. Zhu and R.-G. Xiong, *J. Am. Chem. Soc.*, 2013, **135**, 5230–5233.
- 38 W.-J. Xu, S.-L. Chen, Z.-T. Hu, R.-B. Lin, Y.-J. Su, W.-X. Zhang and X.-M. Chen, *Dalton Trans.*, 2016, **45**, 4224–4229.
- 39 M. Rok, G. Bator, B. Zarychta, B. Dziuk, J. Repeć, W. Medycki, M. Zamponi, G. Usevičius, M. Šimėnas and J. Banys, *Dalton Trans.*, 2019, **48**, 4190–4202.
- 40 C. Shi, C.-H. Yu and W. Zhang, *Angew. Chem. Int. Ed. Engl.*, 2016, **128**, 5892–5896.
- 41 S. Peschel and D. Babel, *Z. Naturforsch. B*, 1994, **49**, 1373–1380.
- 42 M. Rok, G. Bator, W. Medycki, M. Zamponi, S. Balčiūnas, M. Šimėnas and J. Banys, *Dalton Trans.*, 2018, **47**, 17329–17341.
- 43 X.-G. Chen, Z.-X. Zhang, Y.-L. Zeng, S.-Y. Tang and R.-G. Xiong, *Chem. Commun.*, 2022, **58**, 3059–3062.
- 44 M. Rok, A. Ciżman, B. Zarychta, J. K. Zaręba, M. Trzebiatowska, M. Mączka, A. Stroppa, S. Yuan, A. E. Phillips and G. Bator, *J. Mater. Chem. C*, 2020, **8**, 17491–17501.
- 45 W.-J. Xu, P.-F. Li, Y.-Y. Tang, W.-X. Zhang, R.-G. Xiong and X.-M. Chen, *J. Am. Chem. Soc.*, 2017, **139**, 6369–6375.
- 46 M. Schwarten and D. Babel, *Z. anorg. allg. Chem.*, 2000, **626**, 1921–1928.
- 47 M. Schwarten, B. Ziegler, M. Witzei and D. Babel, *Z. Naturforsch. B*, 1997, **52**, 391–397.

- 48 M. Ma Czka, A. Nowok, J. K. Zaręba, D. Stefańska, A. Ga Gor, M. Trzebiatowska and A. Sieradzki, *ACS Appl. Mater. Interfaces*, 2022, **14**, 1460–1471.
- 49 J. A. Hill, A. L. Thompson and A. L. Goodwin, *J. Am. Chem. Soc.*, 2016, **138**, 5886–5896.
- 50 J. Lefebvre, D. Chartrand and D. B. Leznoff, *Polyhedron*, 2007, **26**, 2189–2199.
- 51 M. Mączka, J. Janczak, M. Trzebiatowska, A. Sieradzki, S. Pawlus and A. Pikul, *Dalton Trans.*, 2017, **46**, 8476–8485.
- 52 B. Zhou, Y. Imai, A. Kobayashi, Z.-M. Wang and H. Kobayashi, *Angew. Chem. Int. Ed. Engl.*, 2011, **123**, 11643–11647.
- 53 Z. Wang, B. Zhang, T. Otsuka, K. Inoue, H. Kobayashi and M. Kurmoo, *Dalton Trans.*, 2004, 2209–2216.
- 54 T. Asaji, Y. Ito, J. Seliger, V. Zagar, A. Gradišek and T. Apih, *J. Phys. Chem. A*, 2012, **116**, 12422–12428.
- 55 D.-W. Fu, W. Zhang, H.-L. Cai, Y. Zhang, J.-Z. Ge, R.-G. Xiong, S. D. Huang and T. Nakamura, *Angew. Chem. Int. Ed. Engl.*, 2011, **50**, 11947–11951.
- 56 R. Shang, S. Chen, B.-W. Wang, Z.-M. Wang and S. Gao, *Angew. Chem. Int. Ed. Engl.*, 2016, **128**, 2137–2140.
- 57 R. Shang, G.-C. Xu, Z.-M. Wang and S. Gao, *Chem. Eur. J.*, 2014, **20**, 1146–1158.
- 58 M. Ptak, M. Mączka, A. Gağor, A. Sieradzki, B. Bondzior, P. Dereń and S. Pawlus, *Phys. Chem. Chem. Phys.*, 2016, **18**, 29629–29640.
- 59 M. Ptak, M. Mączka, A. Gağor, A. Sieradzki, A. Stroppa, D. Di Sante, J. M. Perez-Mato and L. Macalik, *Dalton Trans.*, 2016, **45**, 2574–2583.
- 60 A. Ciupa, M. Mączka, A. Gağor, A. Pikul, E. Kucharska, J. Hanuza and A. Sieradzki, *Polyhedron*, 2015, **85**, 137–143.
- 61 C. Luo, M. Fang, Q. Luo, H. Lin, Y. Zhang, F. Yue, P. Xiang and H. Peng, *Crystal Research and Technology*, 2017, **52**.
- 62 A. Rossin, M. R. Chierotti, G. Giambastiani, R. Gobetto and M. Peruzzini, *CrystEngComm*, 2012, **14**, 4454.
- 63 M. Mączka, A. Ciupa, A. Gağor, A. Sieradzki, A. Pikul, B. Macalik and M. Drozd, *Inorg. Chem.*, 2014, **53**, 5260–5268.
- 64 R. E. Marsh, *Acta Crystallogr., Sect. C: Struct. Chem.*, 1986, **42**, 1327–1328.
- 65 K.-L. Hu, M. Kurmoo, Z. Wang and S. Gao, *Chem. Eur. J.*, 2009, **15**, 12050–12064.
- 66 I. E. Collings, J. A. Hill, A. B. Cairns, R. I. Cooper, A. L. Thompson, J. E. Parker, C. C. Tang and A. L. Goodwin, *Dalton Trans.*, 2016, **45**, 4169–4178.
- 67 M. Mączka, N. L. Marinho Costa, A. Gağor, W. Paraguassu, A. Sieradzki and J. Hanuza, *Phys. Chem. Chem. Phys.*, 2016, **18**, 13993–14000.
- 68 B.-Q. Wang, H.-B. Yan, Z.-Q. Huang and Z. Zhang, *Acta Crystallogr., Sect. C: Struct. Chem.*, 2013, **69**, 616–619.
- 69 W. D. C. B. Gunatilleke, K. Wei, Z. Niu, L. Wojtas, G. Nolas and S. Ma, *Dalton Trans.*, 2017, **46**, 13342–13344.
- 70 M. Mączka, K. Pasińska, M. Ptak, W. Paraguassu, T. A. Da Silva, A. Sieradzki and A. Pikul, *Phys. Chem. Chem. Phys.*, 2016, **18**, 31653–31663.

- 71 S. Chen, R. Shang, K.-L. Hu, Z.-M. Wang and S. Gao, *Inorg. Chem. Front.*, 2014, **1**, 83–98.
- 72 J. A. Zienkiewicz, D. A. Kowalska, K. Fedoruk, M. Stefanski, A. Pikul and M. Ptak, *J. Mater. Chem. C*, 2021, **9**, 6841–6851.
- 73 M. Mączka, A. Gağor, M. Ptak, W. Paraguassu, T. A. Da Silva, A. Sieradzki and A. Pikul, *Chem. Mater.*, 2017, **29**, 2264–2275.
- 74 S. Gao and S. W. Ng, *Acta Crystallogr., Sect. E: Struct. Rep.*, 2010, **66**, m1599.
- 75 X.-Y. Wang, L. Gan, S.-W. Zhang and S. Gao, *Inorg. Chem.*, 2004, **43**, 4615–4625.
- 76 E. Sletten and L. H. Jensen, *Acta Crystallogr. B. Struct. Sci. Cryst.*, 1973, **29**, 1752–1756.
- 77 P. Jain, V. Ramachandran, R. J. Clark, H. D. Zhou, B. H. Toby, N. S. Dalal, H. W. Kroto and A. K. Cheetham, *J. Am. Chem. Soc.*, 2009, **131**, 13625–13627.
- 78 A. Rossin, A. Ienco, F. Costantino, T. Montini, B. Di Credico, M. Caporali, L. Gonsalvi, P. Fornasiero and M. Peruzzini, *Cryst. Growth Des.*, 2008, **8**, 3302–3308.
- 79 M. Mączka, B. Bondzior, P. Dereń, A. Sieradzki, J. Trzmiel, A. Pietraszko and J. Hanuza, *Dalton Trans.*, 2015, **44**, 6871–6879.
- 80 M. Mączka, A. Pietraszko, L. Macalik, A. Sieradzki, J. Trzmiel and A. Pikul, *Dalton Trans.*, 2014, **43**, 17075–17084.
- 81 P. Jain, N. S. Dalal, B. H. Toby, H. W. Kroto and A. K. Cheetham, *J. Am. Chem. Soc.*, 2008, **130**, 10450–10451.
- 82 L. C. Gómez-Aguirre, B. Pato-Doldán, J. Mira, S. Castro-García, M. A. Señarís-Rodríguez, M. Sánchez-Andújar, J. Singleton and V. S. Zapf, *J. Am. Chem. Soc.*, 2016, **138**, 1122–1125.
- 83 J.-Q. Liu, J. Wu, J. Wang, L. Lu, C. Daignebonne, G. Calvez, O. Guillou, H. Sakiyama, N. S. Weng and M. Zeller, *RSC Adv.*, 2014, **4**, 20605.
- 84 L. C. Gómez-Aguirre, B. Pato-Doldán, A. Stroppa, S. Yáñez-Vilar, L. Bayarjargal, B. Winkler, S. Castro-García, J. Mira, M. Sánchez-Andújar and M. A. Señarís-Rodríguez, *Inorg. Chem.*, 2015, **54**, 2109–2116.
- 85 Antsyshkina A. S., Porai-Koshits M. A., Ostrikoval V. N., Sadikov G. G., *Sov. J. Coord. Chem.*, 1983, **9**, 855–858.
- 86 Y. Wu, S. Shaker, F. Brivio, R. Murugavel, P. D. Bristowe and A. K. Cheetham, *J. Am. Chem. Soc.*, 2017, **139**, 16999–17002.
- 87 M. Mączka, A. Gağor, D. Stefańska, J. K. Zaręba and A. Pikul, *Dalton Trans.*, 2022, **51**, 9094–9102.
- 88 M. Mączka, D. Stefańska, A. Gağor and A. Pikul, *Dalton Trans.*, 2021, **51**, 352–360.
- 89 M. Mączka, A. Gağor, A. Pikul and D. Stefańska, *RSC Adv.*, 2020, **10**, 19020–19026.
- 90 Y. Wu, T. Binford, J. A. Hill, S. Shaker, J. Wang and A. K. Cheetham, *Chem. Commun.*, 2018, **54**, 3751–3754.
- 91 D.-X. Liu, K.-P. Xie, W.-X. Zhang, M.-H. Zeng and X.-M. Chen, *CrystEngComm*, 2021, **23**, 2208–2214.
- 92 K.-P. Xie, W.-J. Xu, C.-T. He, B. Huang, Z.-Y. Du, Y.-J. Su, W.-X. Zhang and X.-M. Chen, *CrystEngComm*, 2016, **18**, 4495–4498.
- 93 S.-L. Chen, Z.-R. Yang, B.-J. Wang, Y. Shang, L.-Y. Sun, C.-T. He, H.-L. Zhou, W.-X. Zhang and X.-M. Chen, *Sci. China Mater.*, 2018, **61**, 1123–1128.

94 S.-L. Chen, Y. Shang, C.-T. He, L.-Y. Sun, Z.-M. Ye, W.-X. Zhang and X.-M. Chen, *CrystEngComm*, 2018, **20**, 7458–7463.

95 Y.-L. Sun, C. Shi and W. Zhang, *Dalton Trans.*, 2017, **46**, 16774–16778.
